# Supplementary material for: Understanding the Morphological Evolution of InSb Nanoflags Synthesized in Regular Arrays by Chemical Beam Epitaxy
Source: MDPI journal article supplement (doi:10.3390/nano12071090), 2022-03-26
Supplement: s1 [file s1]

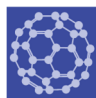

# Understanding the Morphological Evolution of InSb Nanoflags Synthesized in Regular Arrays by Chemical Beam Epitaxy

Isha Verma <sup>1</sup>, Valentina Zannier <sup>1,\*</sup>, Vladimir G. Dubrovskii <sup>2</sup>, Fabio Beltram <sup>1</sup> and Lucia Sorba <sup>1</sup>

<sup>1</sup> NEST, Scuola Normale Superiore and Nanoscienze-CNR, Piazza San Silvestro 12, I-56127 Pisa, Italy; isha.verma@sns.it (I.V.); fabio.beltram@sns.it (F.B.); lucia.sorba@nano.cnr.it (L.S.)

<sup>2</sup> Faculty of Physics, St. Petersburg State University, Universitetskaya Emb. 13B, 199034 St. Petersburg, Russia; dubrovskii@mail.ioffe.ru

\* Correspondence: valentina.zannier@nano.cnr.it

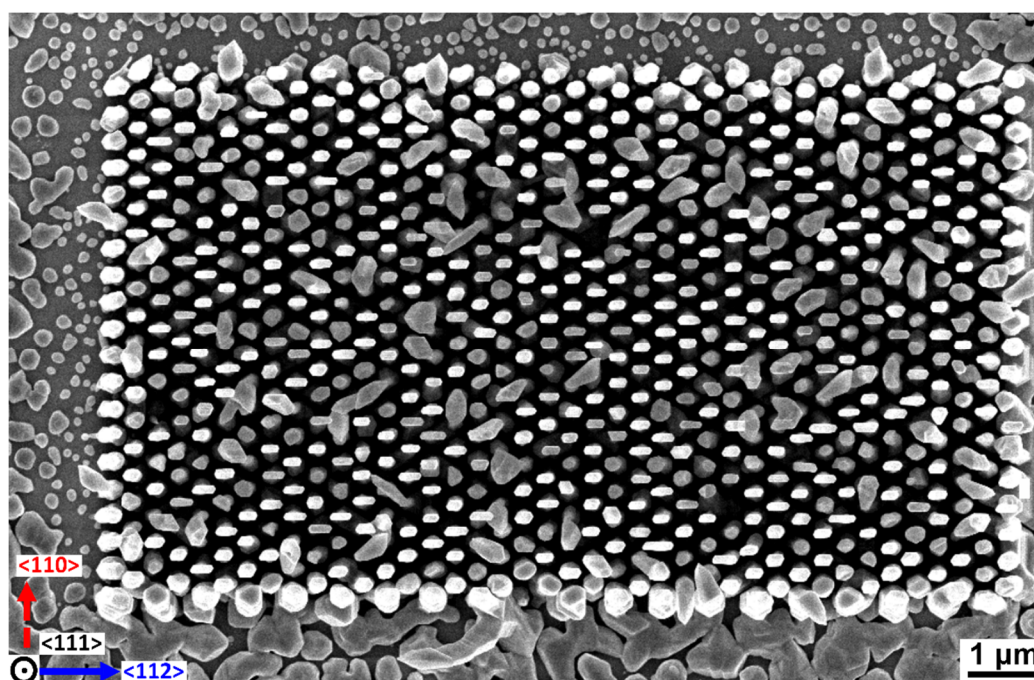

**Figure S1.** Low magnification top-view SEM image of InP-InSb heterostructure NFs grown for 60 min in the pattern having a pitch  $a$  of 700 nm. The yield of straight InSb NFs is  $\sim 87\%$ .
